# Supplementary material
Source: Research Square preprint supplement (doi:10.21203/rs.3.rs-8737049/v1)
Supplement: Supplementary file 1 [file 911c16e95032ee8cb4e2ba79.docx]

**Highlights**

- Thermodynamic modeling of collapse of cavitation bubble in oil film is established.
- Axial velocity of the cavitation bubble under axial laminar flow is considered.
- Effect of axial velocity and film thickness on cavitation bubble is uncovered.
